# Supplementary material for: Temperature-Dependent FTIRS Study of Manganese Oxide Spinel Obtained by Solution Combustion Synthesis (SCS) for Supercapacitor Applications
Source: Preprints.org preprint supplement (doi:10.20944/preprints202409.1870.v1), 2024-09-24
Supplement: Supplementary file 1 [file supplementary]

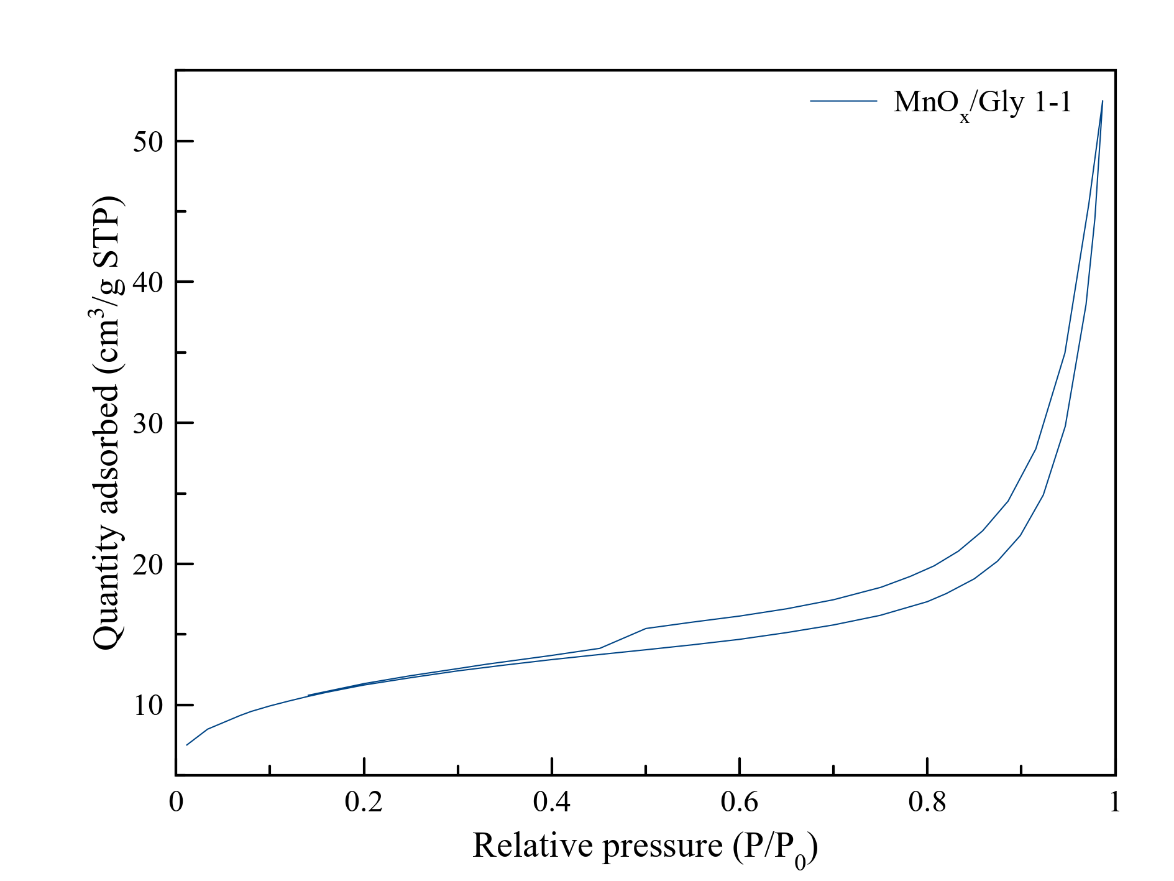


**Figure S1.**N2 isotherm of the MnOx/Glycine sample*.*


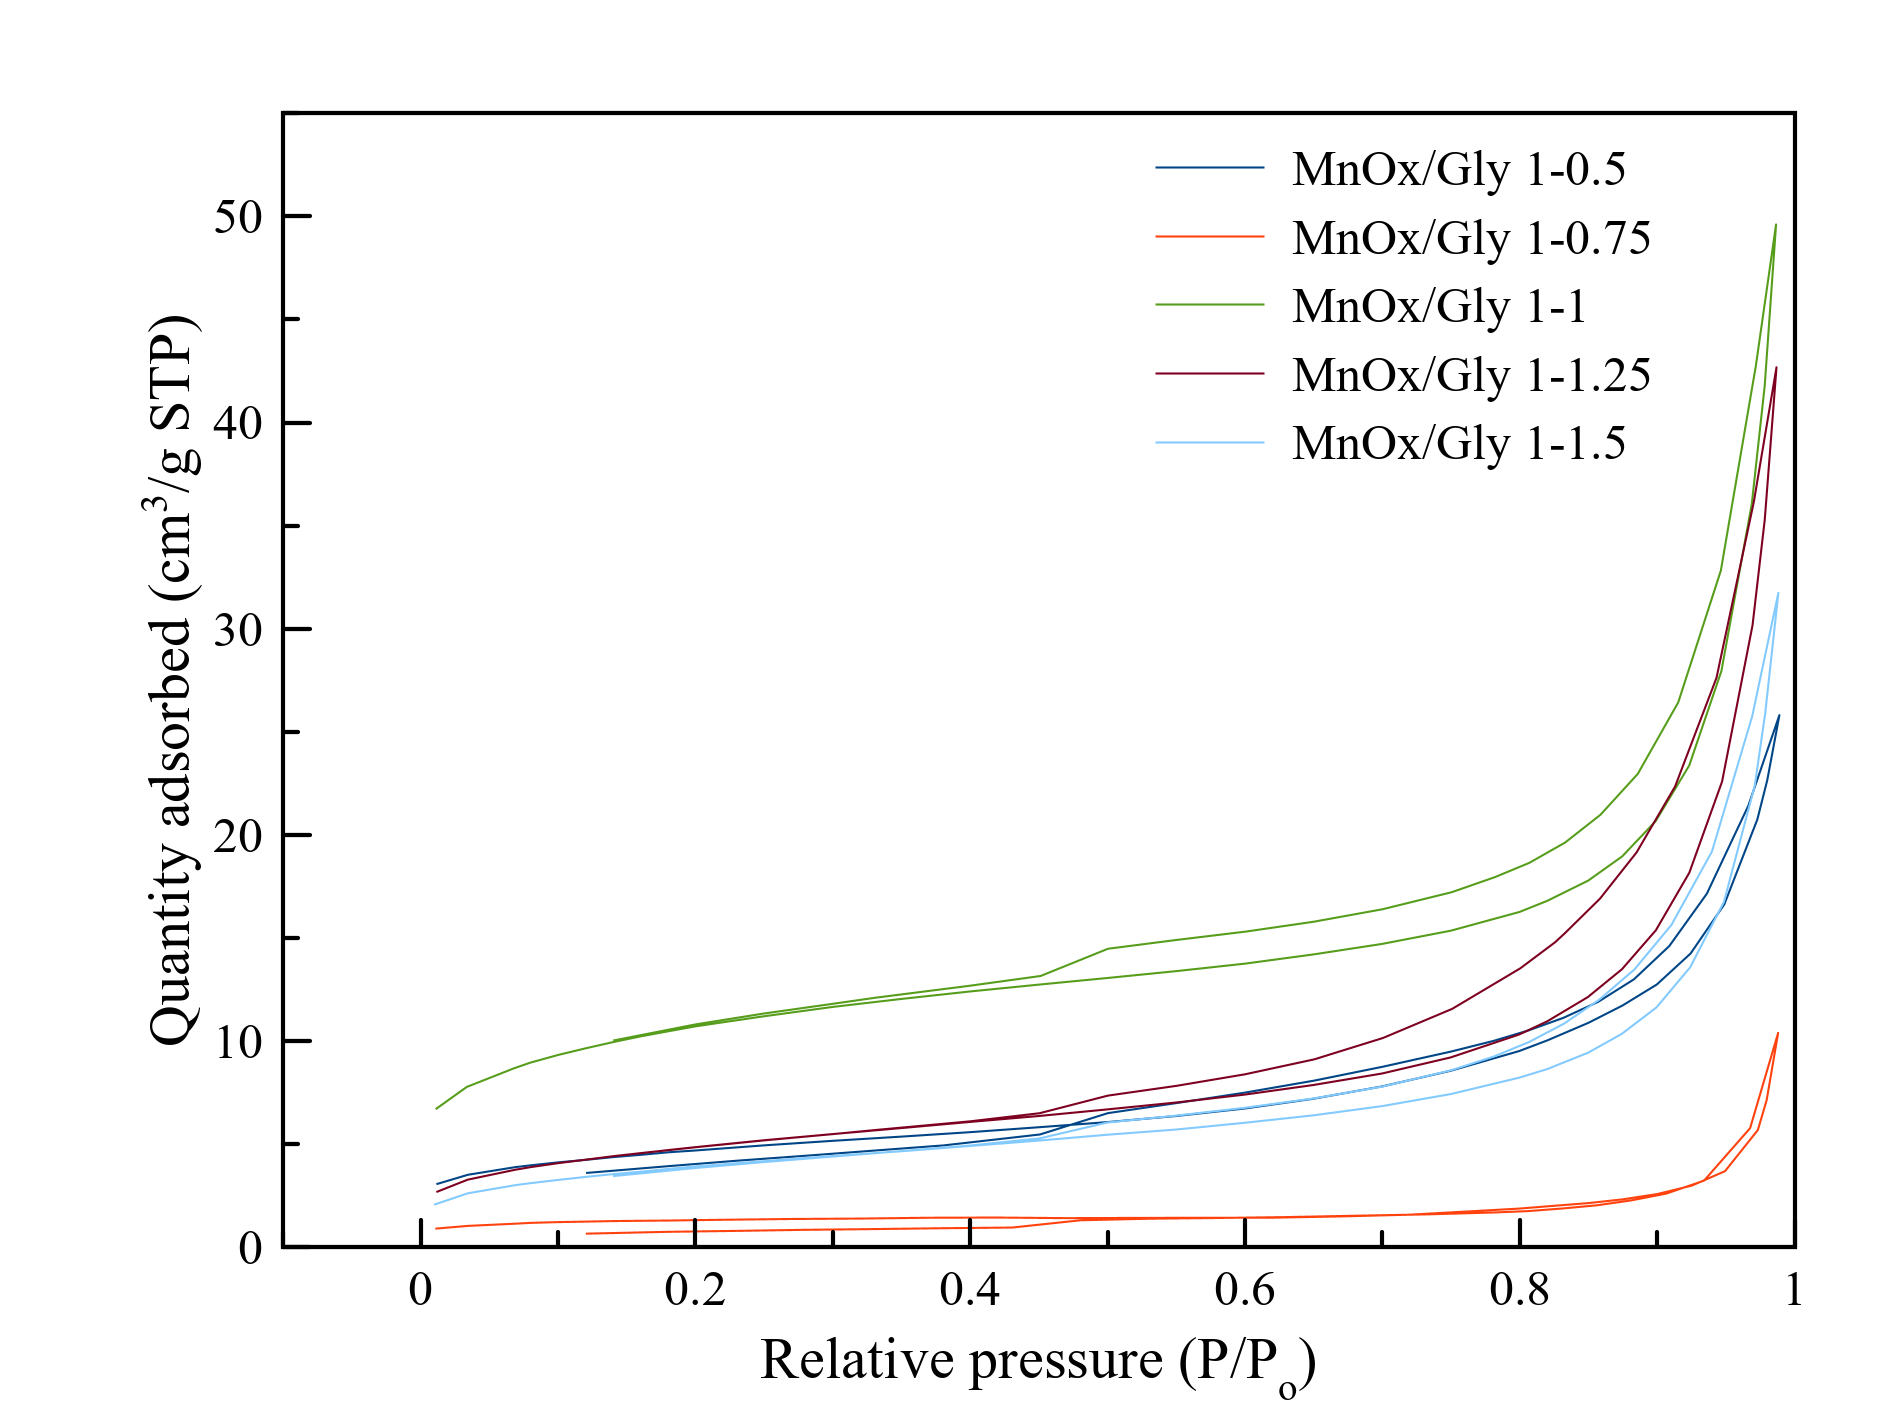


**Figure S2.** N2 isotherm of the MnOx/Glycine samples with different φ ratios


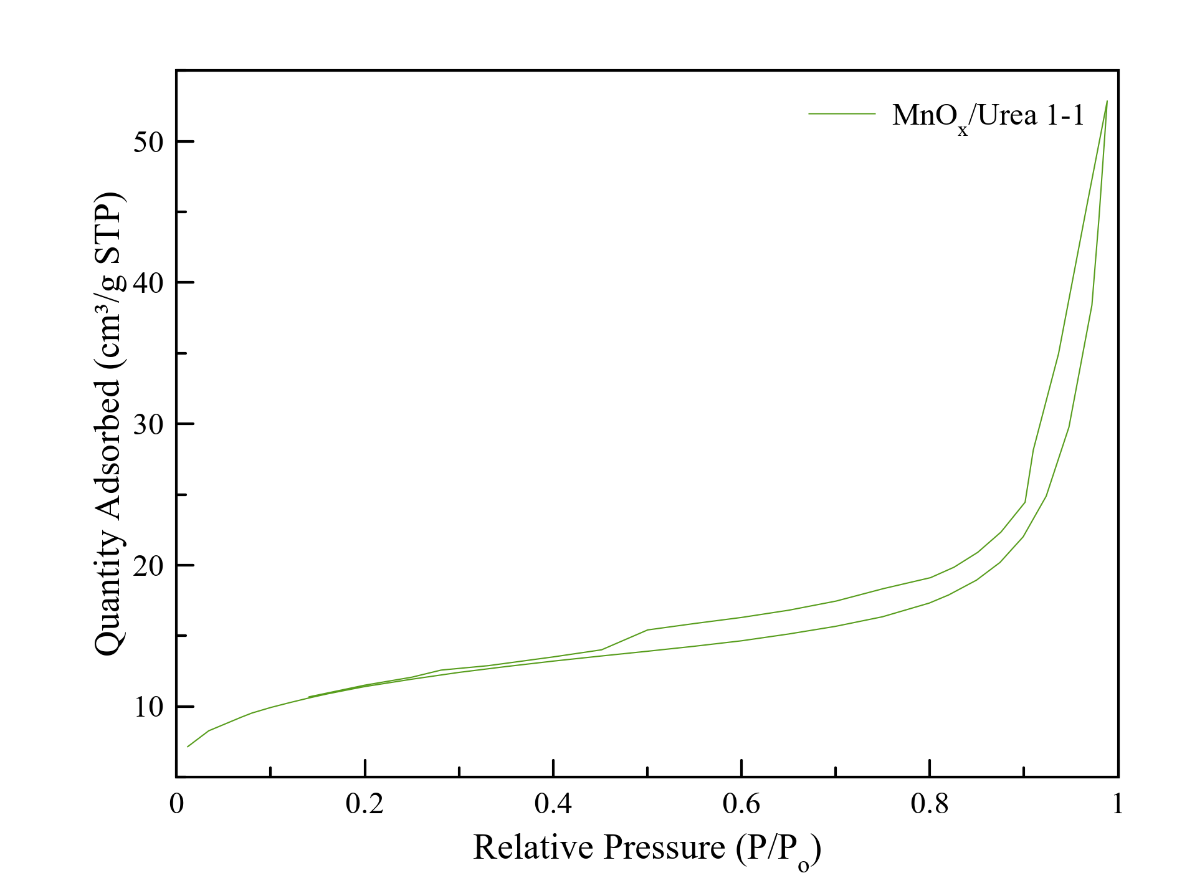


**Figure S3.** N2 isotherm of the MnOx/Urea sample


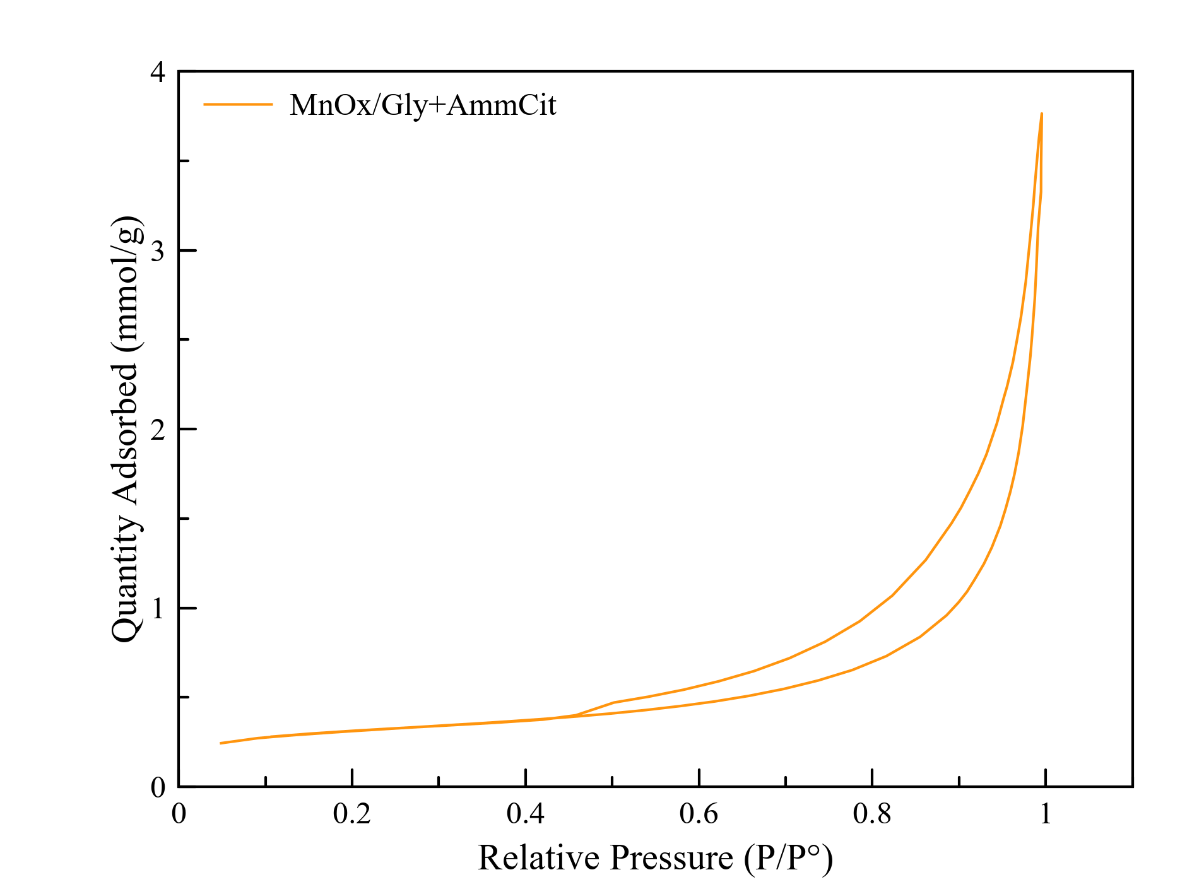


**Figure S4.** N2 isotherm of the MnOx/Glycine-Ammonium Citrate


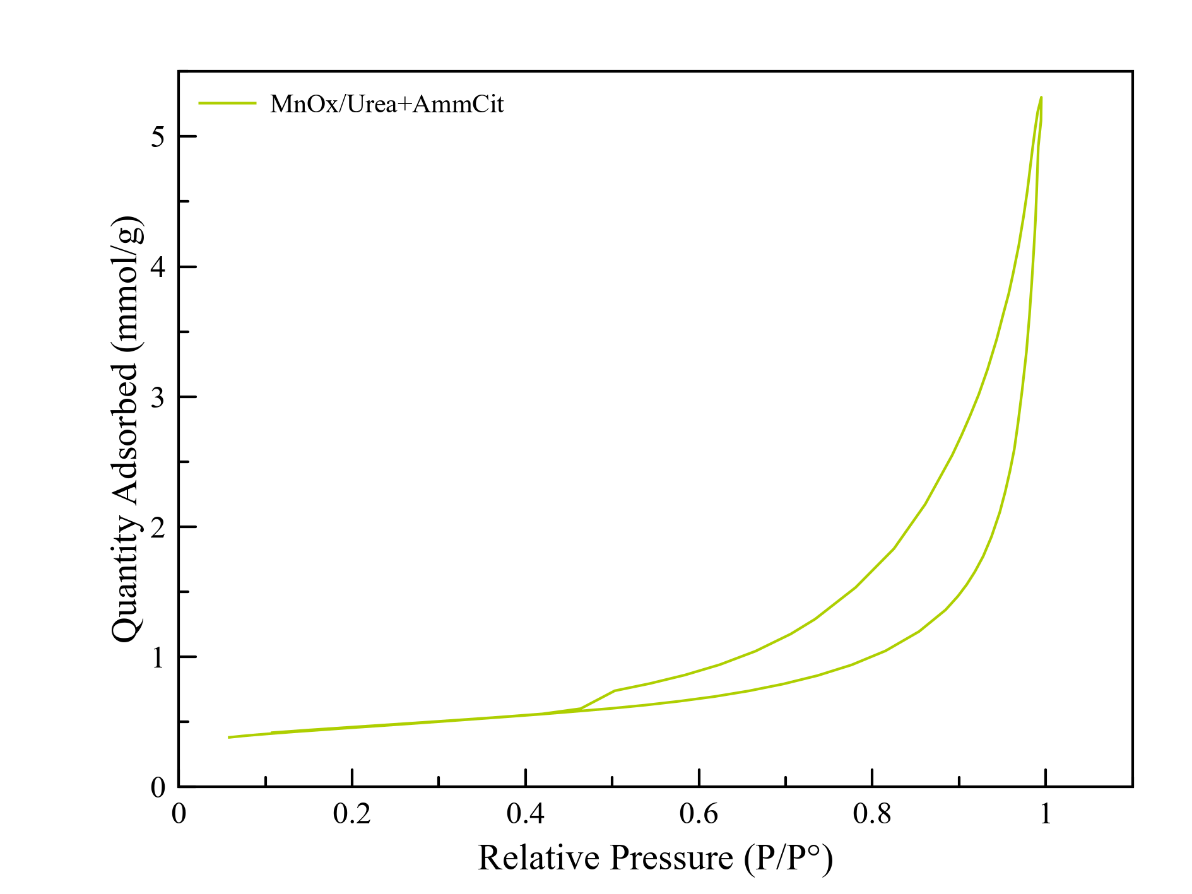


**Figure S5.** N2 isotherm of the MnOx/Urea-Ammonium Citrate sample


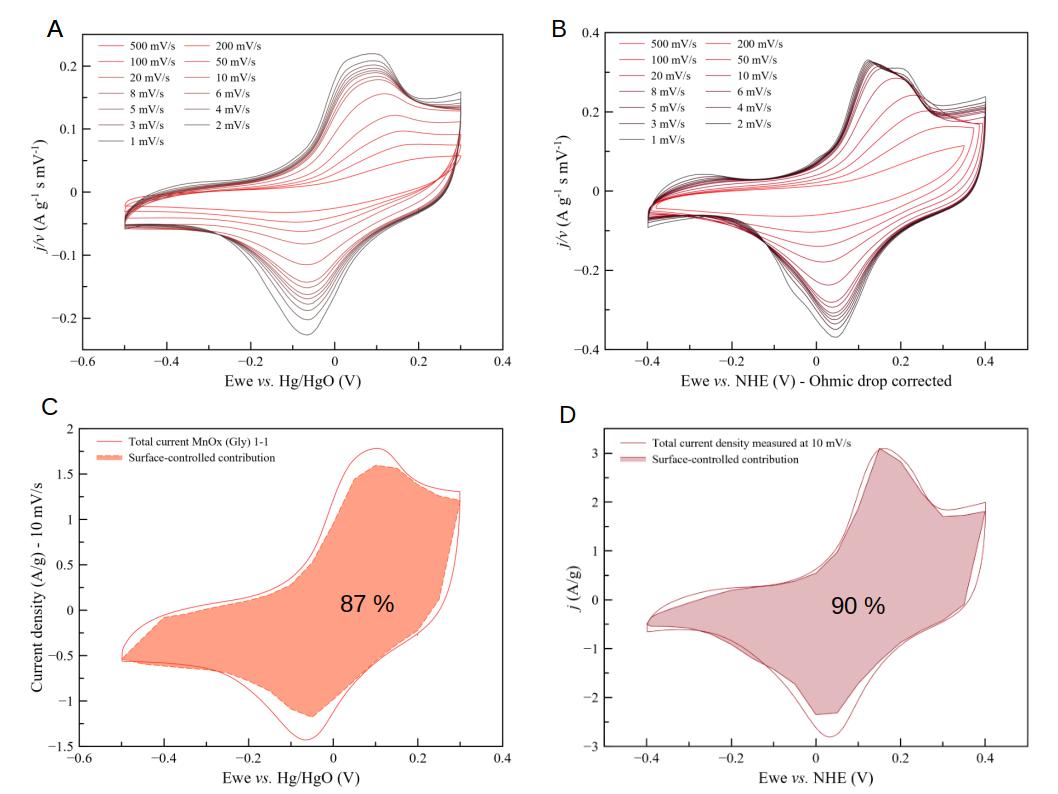


**Figure S6.** The CV curves for MnOx-NG (A) and MnOx-NCU (B) samples in 1M NaOH recorded at different sweep rates. The CV curves containing only the current contribution linear to sweep rate are depicted below for MnOx-NG (C) and MnOx-NCU (D) as a filled area figure.
